# Supplementary material for: Cryogenic III-V and Nb electronics integrated on silicon for large-scale quantum computing platforms
Source: PubMed Central journal article supplement — Nat Commun. 2024 Dec 30;15:10809. doi: 10.1038/s41467-024-55077-1 (PMC11686178; doi:10.1038/s41467-024-55077-1), 2024-12-30
Supplement: 41467_2024_55077_MOESM1_ESM.pdf [file 41467_2024_55077_MOESM1_ESM.pdf]

# Supplementary information

## Cryogenic III-V and Nb electronics integrated on silicon for large-scale quantum computing platforms

Jaeyong Jeong<sup>1</sup>, Seong Kwang Kim<sup>1</sup>, Yoon-Je Suh<sup>1</sup>, Jisung Lee<sup>2</sup> Joonyoung Choi<sup>3</sup>, Joon Pyo Kim<sup>1</sup>, Bong Ho Kim<sup>1</sup>, Juhyuk Park<sup>1</sup>, Joonsup Shim<sup>1</sup>, Nahyun Rheem<sup>1</sup>, Chan Jik Lee<sup>1</sup>, Younjung Jo<sup>3</sup>, Dae-Myeong Geum<sup>4</sup>, Seung-Young Park<sup>2</sup>, Jongmin Kim<sup>5</sup> and Sanghyeon Kim<sup>1\*</sup>

<sup>1</sup> School of Electrical Engineering, Korea Advanced Institute of Science and Technology (KAIST), Daejeon, Republic of Korea

<sup>2</sup> Center for Scientific Instrumentation, Korea Basic Science Institute (KBSI), Daejeon, Republic of Korea

<sup>3</sup> Department of Physics, Kyungpook National University (KNU), Daegu, Republic of Korea

<sup>4</sup> Department of Electrical Engineering, Inha University, Incheon, Republic of Korea

<sup>5</sup> Division of Device Technology, Korea Advanced Nano Fab Center (KANC), Suwon, Republic of Korea

\*Corresponding Author: Sanghyeon Kim ([shkim.ee@kaist.ac.kr](mailto:shkim.ee@kaist.ac.kr))

### Contents

**Supplementary Section 1.** Fabrication process

**Supplementary Section 2.** Contact characterization of Nb/n<sup>+</sup>-InGaAs

**Supplementary Section 3.** STEM analysis on III-V heterostructure

**Supplementary Section 4.** Device cryogenic characterization according to III-V heterostructure

**Supplementary Section 5.** Gate leakage characteristics of a short channel device

**Supplementary Section 6.** Analysis of parasitic resistance components according to temperature

**Supplementary Section 7.** Structure and resistance analysis of routing circuits

## Supplementary Section 1. Fabrication process

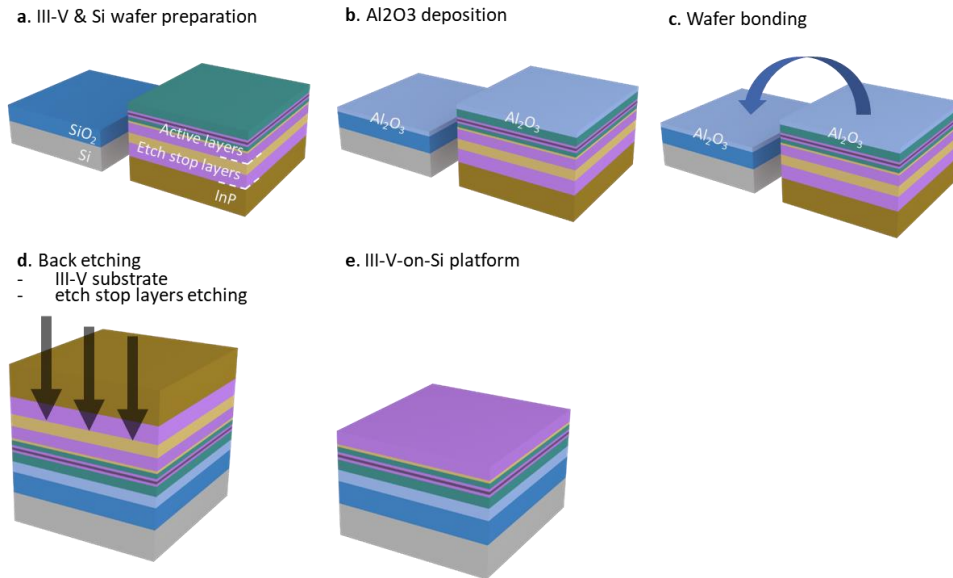

**Supplementary Figure 1 | III-V-on-Si platform. a–e,** Fabrication process flow of the III-V-on-Si platform using direct wafer bonding technique.

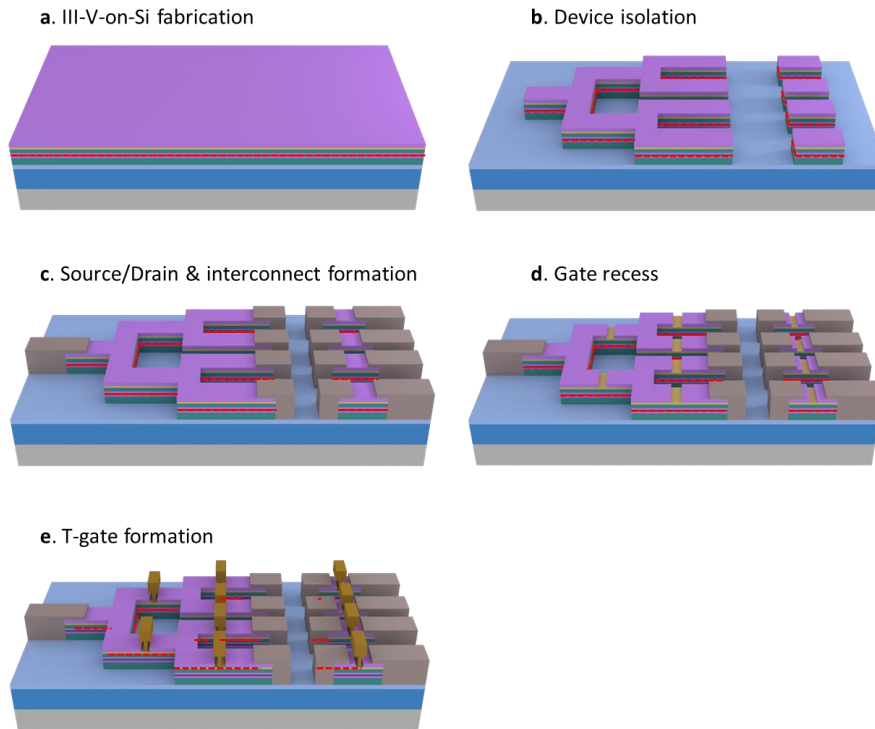

**Supplementary Figure 2 | Cryogenic III-V and Nb electronics integrated on Si. a–e,** Fabrication process flow of heterogeneous and monolithic 3D integrated III-V and Nb-based cryogenic RF transistors and routing circuits using III-V-on-Si platform.

**Supplementary Section 2.** Contact characterization of Nb/n<sup>+</sup>-InGaAs

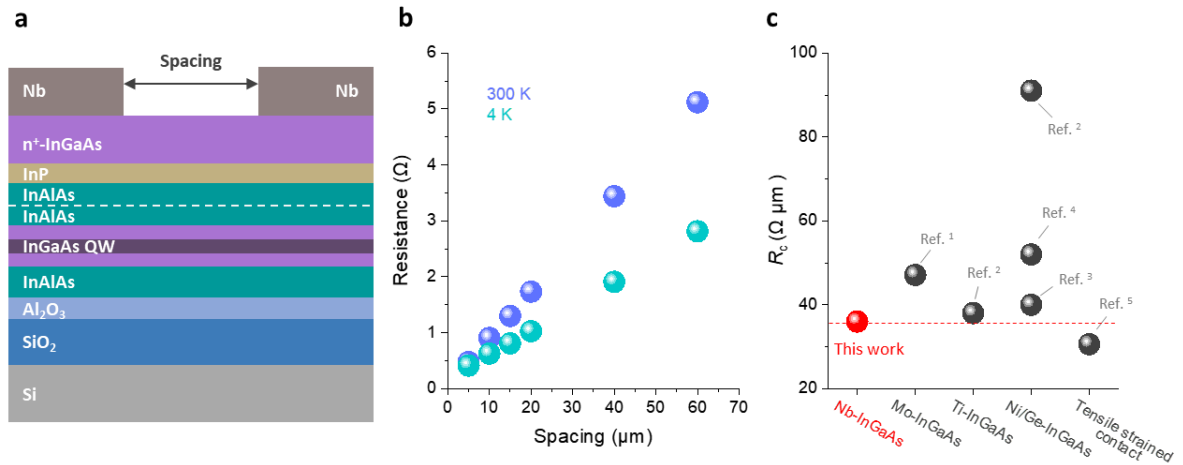

**Supplementary Figure 3 | Characteristics of Nb/n<sup>+</sup>-InGaAs contact.** **a**, Schematic of the transfer length method (TLM) measurement configuration for Nb/n<sup>+</sup>-InGaAs contact. **b**, TLM resistance as a function of spacing length of Nb/n<sup>+</sup>-InGaAs contact at 300 K and 4 K. **c**, Benchmarking of contact resistance ( $R_c$ ) at cryogenic temperature with previously reported values for n<sup>+</sup>-InGaAs.

Supplementary Section 3. STEM analysis on III-V heterostructure

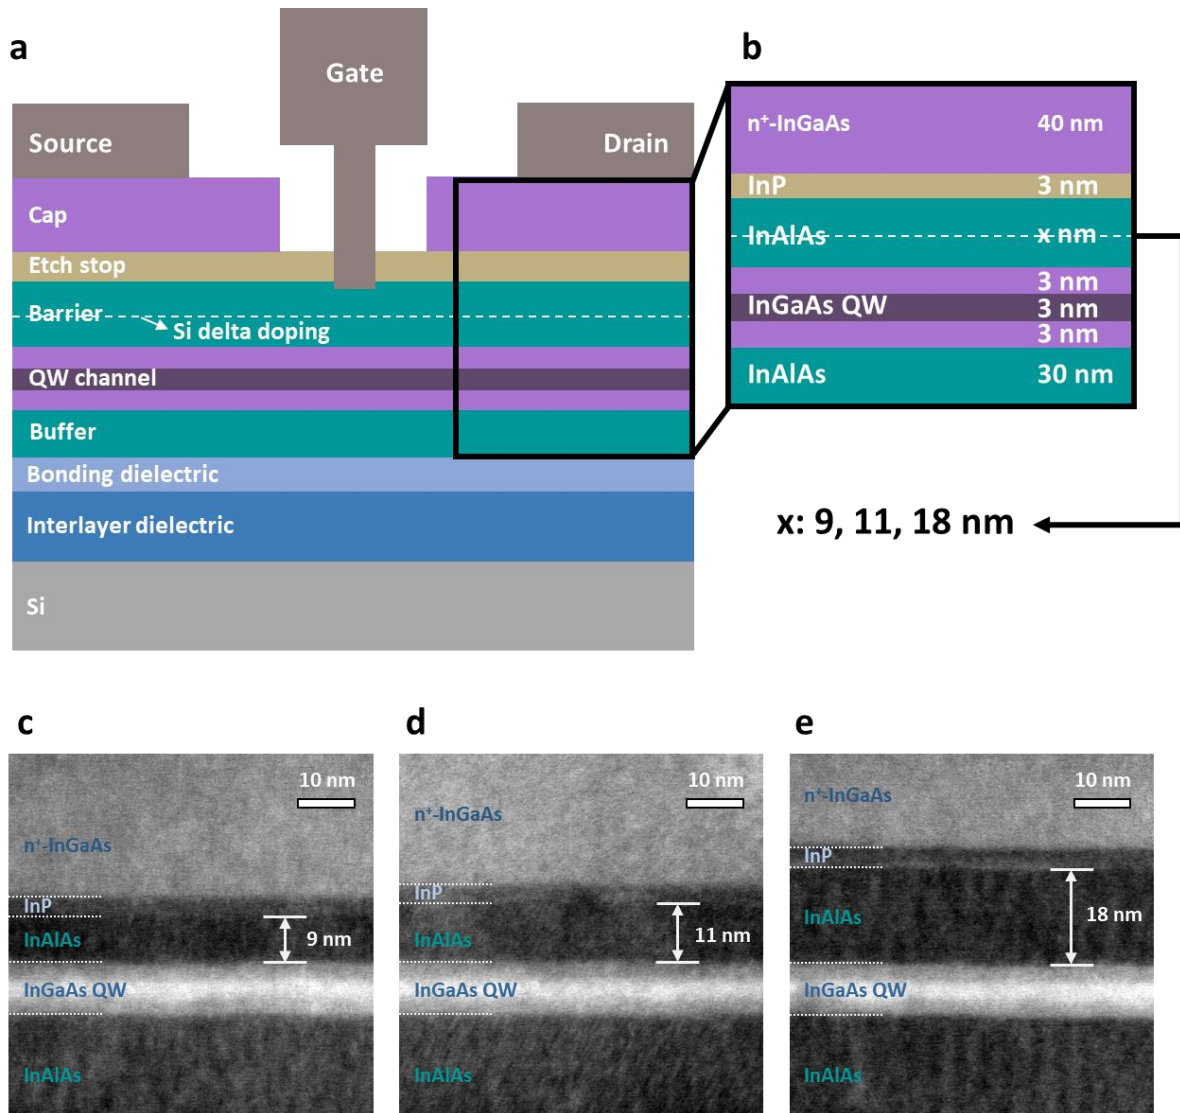

**Supplementary Figure 4 | III-V heterostructure with different barrier thicknesses.** **a**, Schematic of III-V and Nb-based HEMT integrated on Si. **b**, Zoomed structure of active III-V layers, featuring barrier thickness of 9, 11, and 18 nm. **c,d,e**, Scanning transmission electron microscopy (STEM) images of III-V heterostructures, each illustrating divergent InAlAs thickness: (c) 9, (d) 11, and (e) 18 nm. It was clearly confirmed that the epitaxial layers are uniformly grown with the target design thickness of each layer.

**Supplementary Section 4. Device cryogenic characterization according to III-V heterostructure**

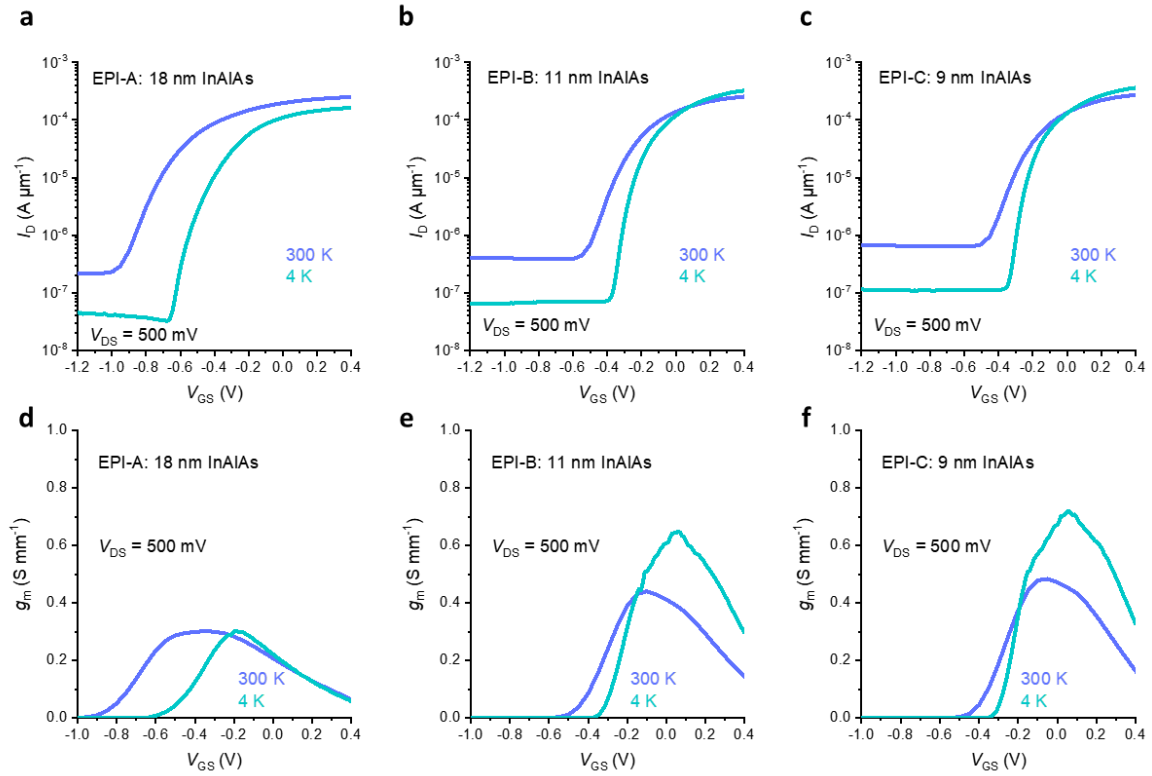

**Supplementary Figure 5 | Cryogenic characteristics depending on the III-V heterostructure.** a–c, Transfer characteristics of III-V HEMTs on Si with  $L_G = 2 \mu m$  and different barrier thicknesses of 9 nm (a), 11 nm (b), 18 nm (c) at 300 K and 4 K. d–f, Transconductance characteristics of III-V HEMTs on Si with  $L_G = 2 \mu m$  and different barrier thicknesses of 9 nm (d), 11 nm (e), 18 nm (f) at 300 K and 4 K.

**Supplementary Section 5.** Gate leakage characteristics of a short channel device

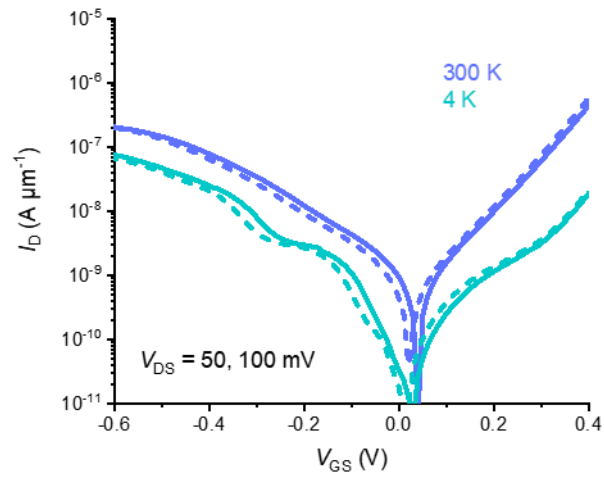

**Supplementary Figure 6 | Gate leakage characteristics of the devices.** Gate leakage current of III-V HEMTs on Si for the same device as in Figure 3a measured at  $V_{DS}$  of 50 (dashed) and 100 mV (solid). The measurements were conducted at 300 K and 4 K.

**Supplementary Section 6. Analysis of parasitic resistance components according to temperature**

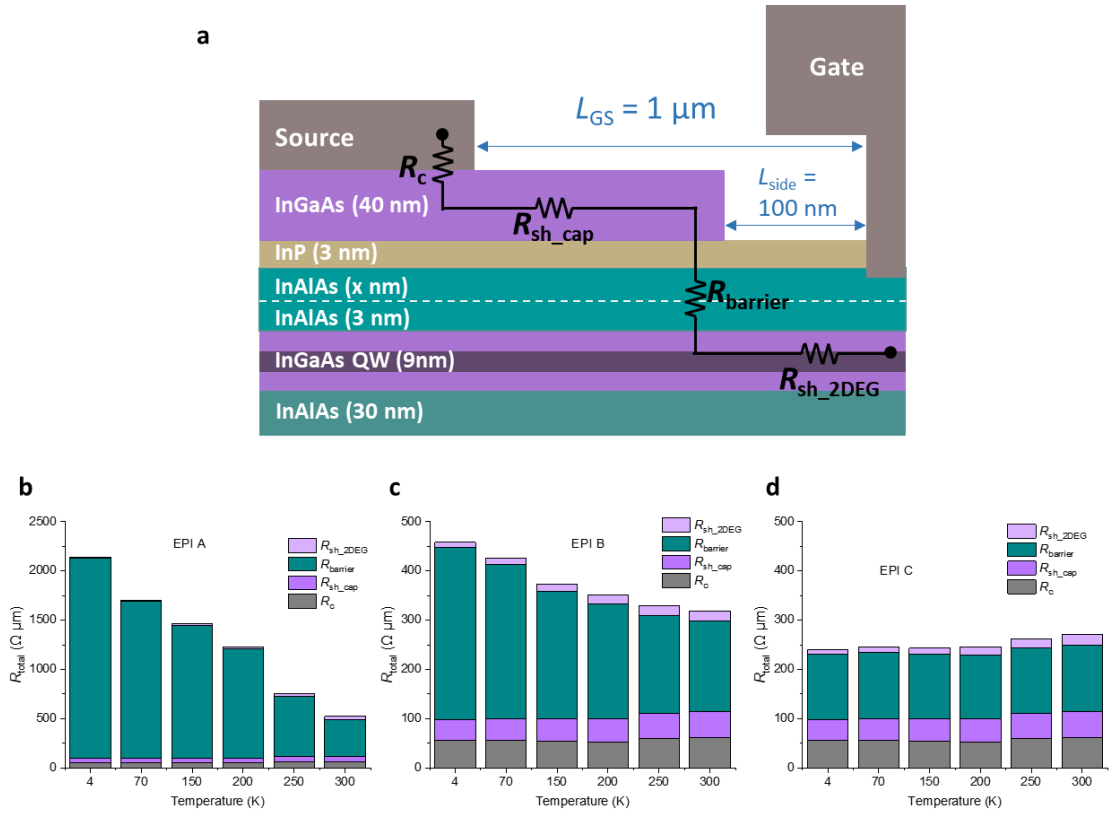

**Supplementary Figure 7 | Analysis of parasitic resistance components in cryogenic devices with different III-V heterostructures. a**, Schematic of InGaAs HEMT with parasitic resistance components. **b–d**, Extraction results of parasitic resistance components within the III-V HEMT structure with three different III-V heterostructures from 300 K to 4 K. Comparing the  $R_c$  values from 300 K to 4 K, the  $R_c$  changes are not significant.

Supplementary Section 7. Structure and resistance analysis of routing circuits

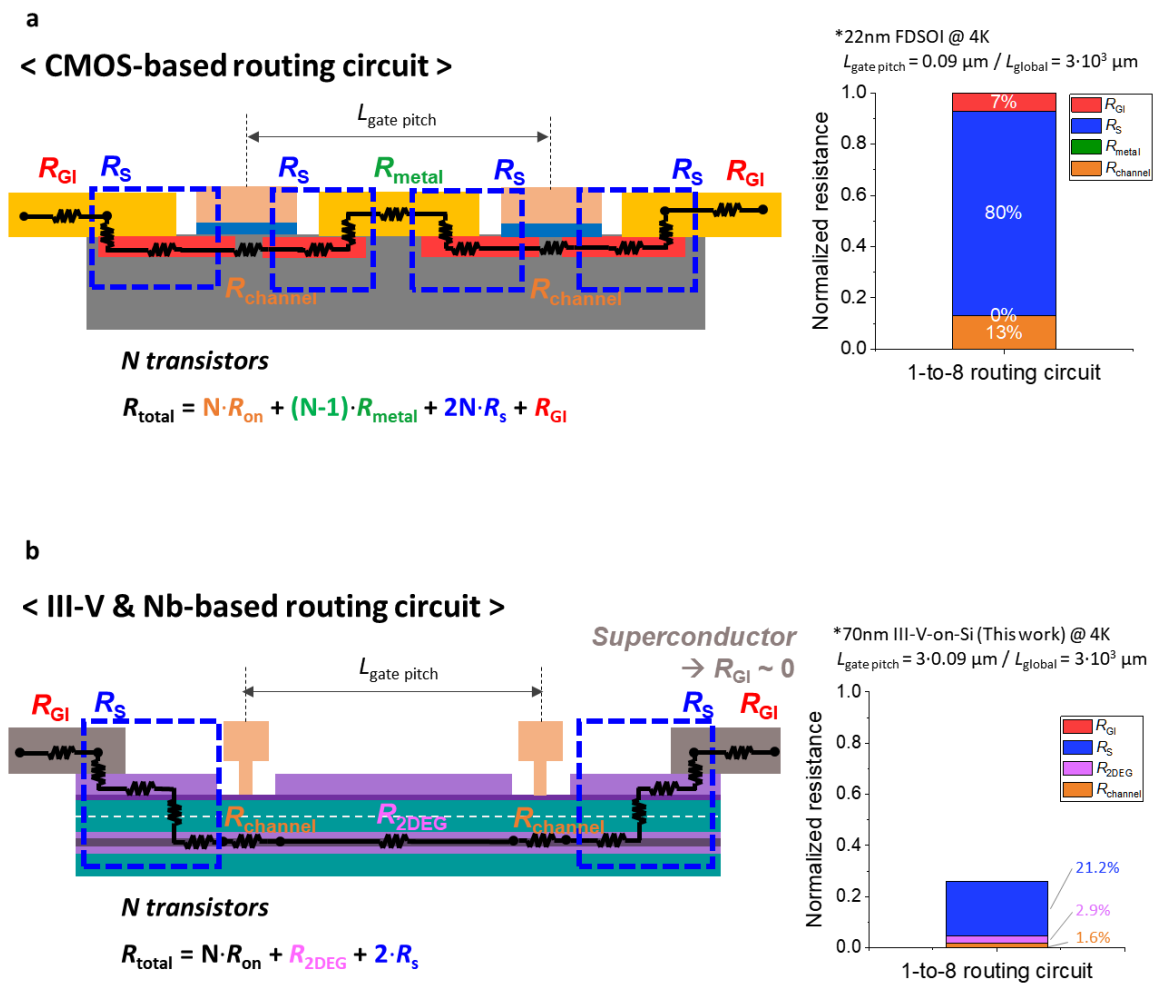

Supplementary Figure 8 | Routing circuit structure analysis and resistance comparison. **a**, Structure and resistance components of CMOS-based routing circuit. **b**, Structure and resistance components of III-V and Nb-based routing circuit.



## Supplementary References:

1. Jeong, J. *et al.* Influence of Channel Structure on the Subthreshold Swing of InGaAs HEMTs at Cryogenic Temperatures Down to 4 K. *IEEE Trans. Electron Devices* **71**, 3390–3395 (2024).
2. Alt, A. R. & Bolognesi, C. R. Temperature dependence of annealed and nonannealed HEMT ohmic contacts between 5 and 350 K. *IEEE Trans. Electron Devices* **60**, 787–792 (2013).
3. Schlee, J. *et al.* Ultralow-power cryogenic InP HEMT with minimum noise temperature of 1 K at 6 GHz. *IEEE Electron Device Lett.* **33**, 664–666 (2012).
4. Ferraris, A. *et al.* Cryogenic InGaAs HEMT-Based Switches For Quantum Signal Routing. In *International Electron Devices Meeting (IEDM)* 461–464 (2022).
5. Cha, E. *et al.* Cryogenic InGaAs HEMTs with Reduced On-Resistance using Strained Ohmic Contacts. In *International Electron Devices Meeting (IEDM)* 34.5.1–34.5.4 (IEEE, 2023).
